# Supplementary material for: Flavone and Hydroxyflavones Are Ligands That Bind the Orphan Nuclear Receptor 4A1 (NR4A1)
Source: MDPI journal article supplement (doi:10.3390/ijms24098152), 2023-05-02
Supplement: s1 [file s1]

## SUPPLEMENTAL FIGURE

Figure S1: Structures of flavonoids used in this study and their docking scores as determined using Maestro/Schrodinger modeling software

|                                                                                                |                                                                                          |                                                                                                   |                                                                            |                                                                                              |
|------------------------------------------------------------------------------------------------|------------------------------------------------------------------------------------------|---------------------------------------------------------------------------------------------------|----------------------------------------------------------------------------|----------------------------------------------------------------------------------------------|
|                                                                                                |                                                                                          |                                                                                                   |                                                                            |                                                                                              |
| Title: 5,7,3',4'-Tetrahydroxyflavone (Luteolin)<br>Docking Score: TMZ301/TMZ302 -7.059/-5.832  | Title: 3,5,7-Trihydroxyflavone (Galangin)<br>Docking Score: TMZ301/TMZ302 -6.791/-4.83   | Title: 3'-Hydroxyflavone<br>Docking Score: TMZ301/TMZ302 -6.756/-5.176                            | Title: 7,3'-Dihydroxyflavone<br>Docking Score: TMZ301/TMZ302 -6.719/-5.559 | Title: 4',5,7-trihydroxyflavanone (Naringenin)<br>Docking Score: TMZ301/TMZ302 -6.618/-5.656 |
|                                                                                                |                                                                                          |                                                                                                   |                                                                            |                                                                                              |
| Title: 3,5,7,4'-Tetrahydroxyflavone (Kaempferol)<br>Docking Score: TMZ301/TMZ302 -6.555/-5.433 | Title: 5,7,4'-Trihydroxyflavone (Apigenin)<br>Docking Score: TMZ301/TMZ302 -6.441/-4.782 | Title: 3,7,3',4',5'-Pentahydroxyflavone (Quercetin)<br>Docking Score: TMZ301/TMZ302 -6.437/-5.397 | Title: 5,7 Dihydroxyflavone<br>Docking Score: TMZ301/TMZ302 -6.399/-5.543  | Title: 5-Hydroxyflavone<br>Docking Score: TMZ301/TMZ302 -6.302/-4.732                        |
|                                                                                                |                                                                                          |                                                                                                   |                                                                            |                                                                                              |
| Title: 7,8-Dihydroxyflavone<br>Docking Score: TMZ301/TMZ302 -5.941/-5.049                      | Title: 3,7-Dihydroxyflavone<br>Docking Score: TMZ301/TMZ302 -5.934/-5.851                | Title: 7-Hydroxyflavone<br>Docking Score: TMZ301/TMZ302 -5.878/-5.477                             | Title: 4'-Hydroxyflavone<br>Docking Score: TMZ301/TMZ302 -5.861/-4.717     | Title: Flavone<br>Docking Score: TMZ301/TMZ302 -5.741/-4.582                                 |
|                                                                                                |                                                                                          |                                                                                                   |                                                                            |                                                                                              |
| Title: 3',4'-Dihydroxyflavone<br>Docking Score: TMZ301/TMZ302 -5.736/-5.507                    | Title: 5,6,7-Trihydroxyflavone (Baicalein)<br>Docking Score: TMZ301/TMZ302 -5.711/-5.711 | Title: 6-Hydroxyflavone<br>Docking Score: TMZ301/TMZ302 -5.619/-5.4                               | Title: 7,4'-Dihydroxyflavone<br>Docking Score: TMZ301/TMZ302 -5.575/-5.42  | Title: 3-Hydroxyflavone<br>Docking Score: TMZ301/TMZ302 -5.507/-4.716                        |
|                                                                                                |                                                                                          |                                                                                                   |                                                                            |                                                                                              |
| Title: 3,6-Dihydroxyflavone<br>Docking Score: TMZ301/TMZ302 -4.695/-5.51                       |                                                                                          |                                                                                                   |                                                                            |                                                                                              |
